# Supplementary material for: Targeting biomarkers in the gas phase through a chemoresistive electronic nose based on graphene functionalized with metal phthalocyanines
Source: Royal Society of Chemistry journal article supplement (doi:10.1039/d2ra07607a), 2022-12-21
Supplement: d2ra07607a1.pdf [file d2ra07607a1.pdf]

SUPPORTING INFORMATION to:

**Targeting biomarkers in the gas phase through a chemoresistive  
electronic nose based on graphene functionalized with metal  
phthalocyanines**

Sonia Freddi,<sup>a,b</sup> Camilla Marzuoli,<sup>a,†</sup> Stefania Pagliara,<sup>a</sup> Giovanni Drera,<sup>a</sup> and Luigi Sangaletti <sup>a</sup>

<sup>a</sup> Surface Science and Spectroscopy lab @ I-Lamp, Department of Mathematics and Physics, Università Cattolica del Sacro Cuore, Via della Garzetta 48, 25123 Brescia (Italy)

<sup>b</sup> Department of Chemistry, Division of Molecular Imaging and Photonics, KU Leuven, Celestijnenlaan 200F, 3001 Leuven (Belgium)

<sup>†</sup> Current affiliation: Center for Nano Science and Technology @PoliMi, Istituto Italiano di Tecnologia, Via Giovanni Pascoli 70/3, 20133 Milano (Italy) – Department of Physics, Politecnico di Milano, P.zza L. Da Vinci 32, 20133 Milano (Italy)

CONTENT:

1. Gas exposures set up (Figure S1)
2. Comparison between Raman spectra collected on phthalocyanine powder and on the developed samples (Figure S2)
3. AFM characterization (Figure S3)
4. Batch-to-batch reproducibility (Table S.I, Table S.II, Table S.III)
5. Exposures to low ammonia concentration and recovery time analysis (Figure S4, Table S.IV)
6. Freundlich fitting parameters and detection limit evaluation (Table S.V, Table S.VI)
7. Benchmarking for sensitivity and detection limit (Table S.VII)
8. Ammonia exposures for CoPc layer (Figure S5)
9. Raman maps on Gr\_CoPC (Figure S6)
10. Details on the  $(\Delta R/R_0)_{\text{pos}}$  and  $(\Delta R/R_0)_{\text{neg}}$  evaluation
11. Concentration range of all selected target gas molecules (Table S.VIII)

## 1. Gas exposures set up

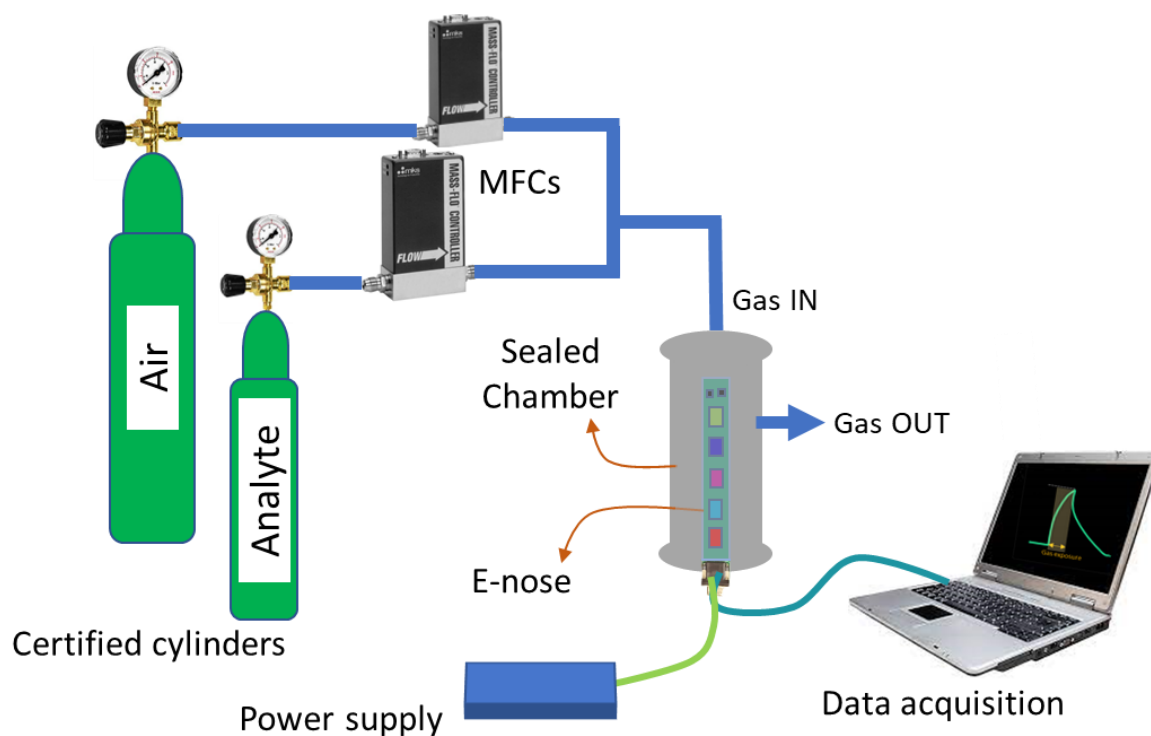

**Figure S1:** schematic set up for the gas exposures. The system comprises a homemade steel sealed chamber, connected to 2 mass flow controllers (MFCs), a PC for data acquisition, a certified cylinder filled with air and certified cylinders containing the target gas molecules (S.I.A.D Spa). The MCF connected to the air cylinder has a maximum flow of 500 sccm, while the max flow of the MFC connected to the analyte cylinders is 200 sccm. A power supply is connected to the platform hosting the developed samples and mounted inside the chamber.

## 2. Comparison between Raman spectra collected on phthalocyanine powder and on the developed samples

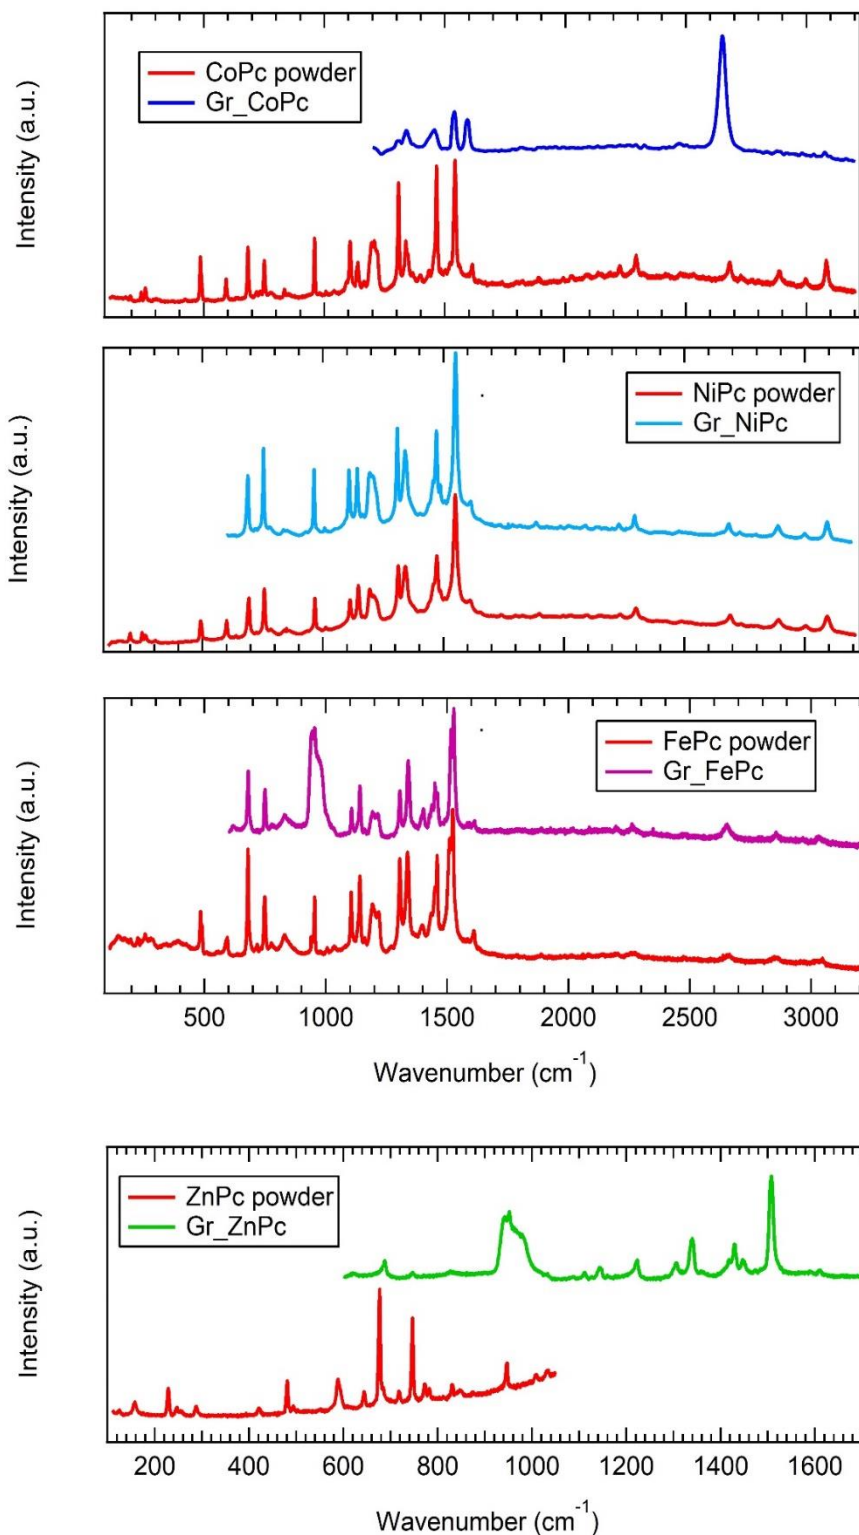

**Figure S2:** Comparison between the Raman spectra of the phthalocyanine powder (red spectra) and the Raman spectra of graphene on Si/Si<sub>3</sub>N<sub>4</sub> functionalized with the phthalocyanine. Of note, regarding ZnPc both spectra span a different range than the other samples: indeed, the ZnPc powder spectrum range is cut at 1050 cm<sup>-1</sup> while the Gr\_ZnPc one is cut at 1660 cm<sup>-1</sup>, due to luminescence.

### 3. AFM characterization

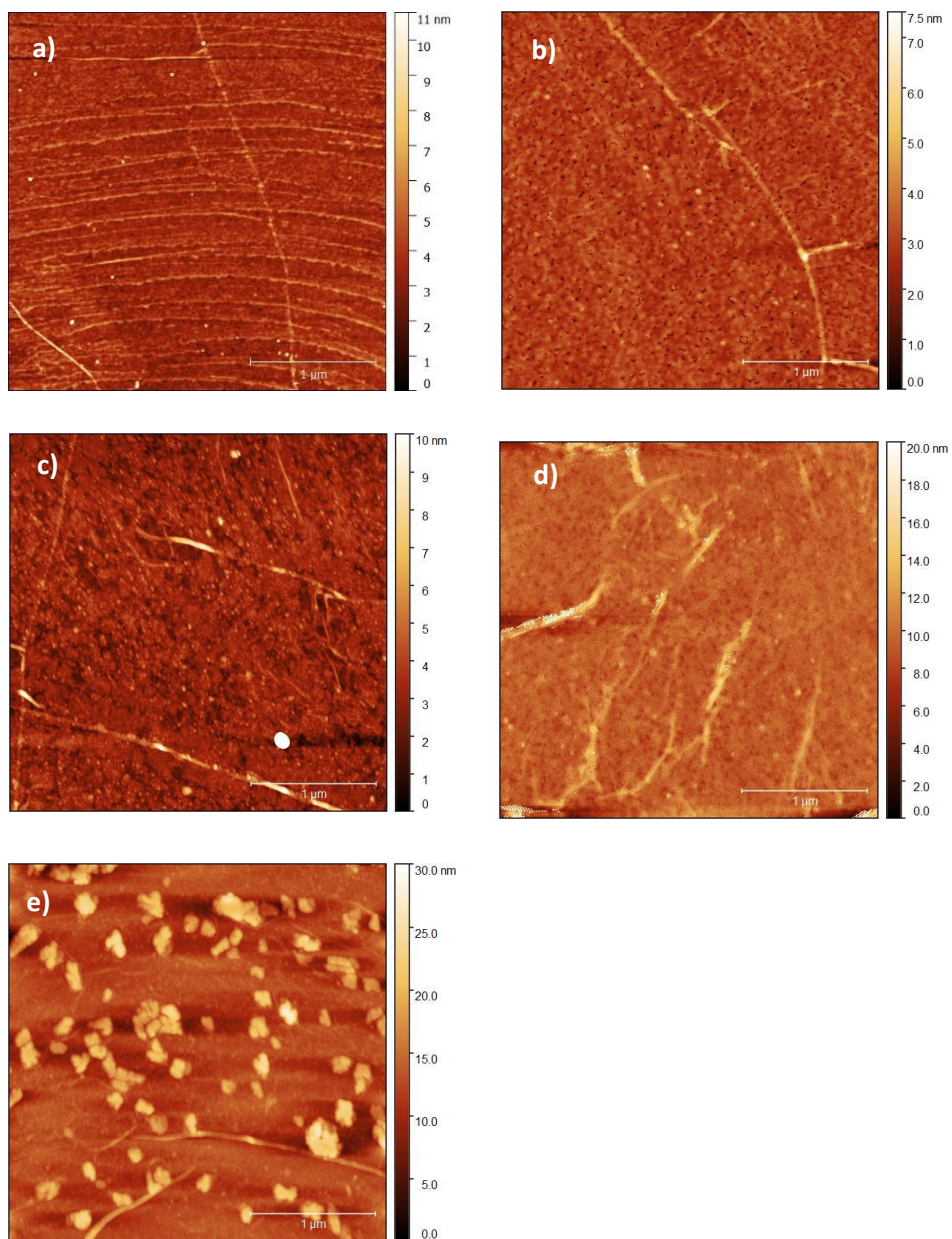

**Figure S3:** AFM images of: pristine graphene (a), and graphene functionalized with CoPc (b), FePc (c), NiPc (d), ZnPc (e) layers.

#### 4. Batch-to-batch reproducibility

**Table S.I:** Baseline resistance of the graphene layers selected to develop the sensors, measured before the functionalization. The values are comparable, indicating a sample-to-sample baseline resistance reproducibility.

| <b>Sensor</b> | <b>Baseline resistance (k<math>\Omega</math>)</b> |
|---------------|---------------------------------------------------|
| Gr_CoPc       | 2.11 $\pm$ 0.01                                   |
| Gr_FePc       | 2.05 $\pm$ 0.01                                   |
| Gr_NiPc       | 2.12 $\pm$ 0.01                                   |
| Gr_ZnPc       | 2.15 $\pm$ 0.01                                   |
| Gr_pristine   | 2.06 $\pm$ 0.01                                   |

**Table S.II:** Baseline resistance of the graphene layers measured before the functionalization ( $R_{0\_before}$ ) and after the functionalization ( $R_{0\_after}$ ) and value of the roughness, evaluated on several AFM images, for the Gr\_CoPc\_A, B and C samples prepared for the reproducibility tests. The values are always comparable to the ones registered for the sample used in the e-nose (Gr\_CoPc), proving a batch-to-batch reproducibility.

|                                                          | <b>Gr_CoPc</b>    | <b>Gr_CoPc_A</b>  | <b>Gr_CoPc_B</b>  | <b>Gr_CoPc_C</b>  |
|----------------------------------------------------------|-------------------|-------------------|-------------------|-------------------|
| <b><math>R_{0\_before}</math> (k<math>\Omega</math>)</b> | 2.11 $\pm$ 0.01   | 2.12 $\pm$ 0.01   | 2.05 $\pm$ 0.01   | 2.15 $\pm$ 0.01   |
| <b><math>R_{0\_after}</math> (k<math>\Omega</math>)</b>  | 0.738 $\pm$ 0.001 | 0.742 $\pm$ 0.001 | 0.739 $\pm$ 0.001 | 0.742 $\pm$ 0.001 |
| <b>Roughness (pm)</b>                                    | 0.31 $\pm$ 0.12   | 0.28 $\pm$ 0.08   | 0.27 $\pm$ 0.09   | 0.30 $\pm$ 0.10   |

**Table S.III:** Baseline resistance of the graphene layers measured before the functionalization ( $R_{0\_before}$ ) and after the functionalization ( $R_{0\_after}$ ) and value of the roughness, evaluated on several AFM images, for the Gr\_NiPc\_A, B and C samples prepared for the reproducibility tests. The values are always comparable to the ones registered for the sample used in the e-nose (Gr\_NiPc), proving a batch-to-batch reproducibility.

|                                                          | <b>Gr_NiPc</b>  | <b>Gr_NiPc_A</b> | <b>Gr_NiPc_B</b> | <b>Gr_NiPc_C</b> |
|----------------------------------------------------------|-----------------|------------------|------------------|------------------|
| <b><math>R_{0\_before}</math> (k<math>\Omega</math>)</b> | 2.12 $\pm$ 0.01 | 2.14 $\pm$ 0.01  | 2.08 $\pm$ 0.01  | 2.13 $\pm$ 0.01  |
| <b><math>R_{0\_after}</math> (k<math>\Omega</math>)</b>  | 1.50 $\pm$ 0.01 | 1.51 $\pm$ 0.01  | 1.48 $\pm$ 0.01  | 1.52 $\pm$ 0.01  |
| <b>Roughness (pm)</b>                                    | 0.48 $\pm$ 0.17 | 0.39 $\pm$ 0.12  | 0.34 $\pm$ 0.11  | 0.44 $\pm$ 0.16  |

## 5. Exposures to low ammonia concentration and recovery time analysis

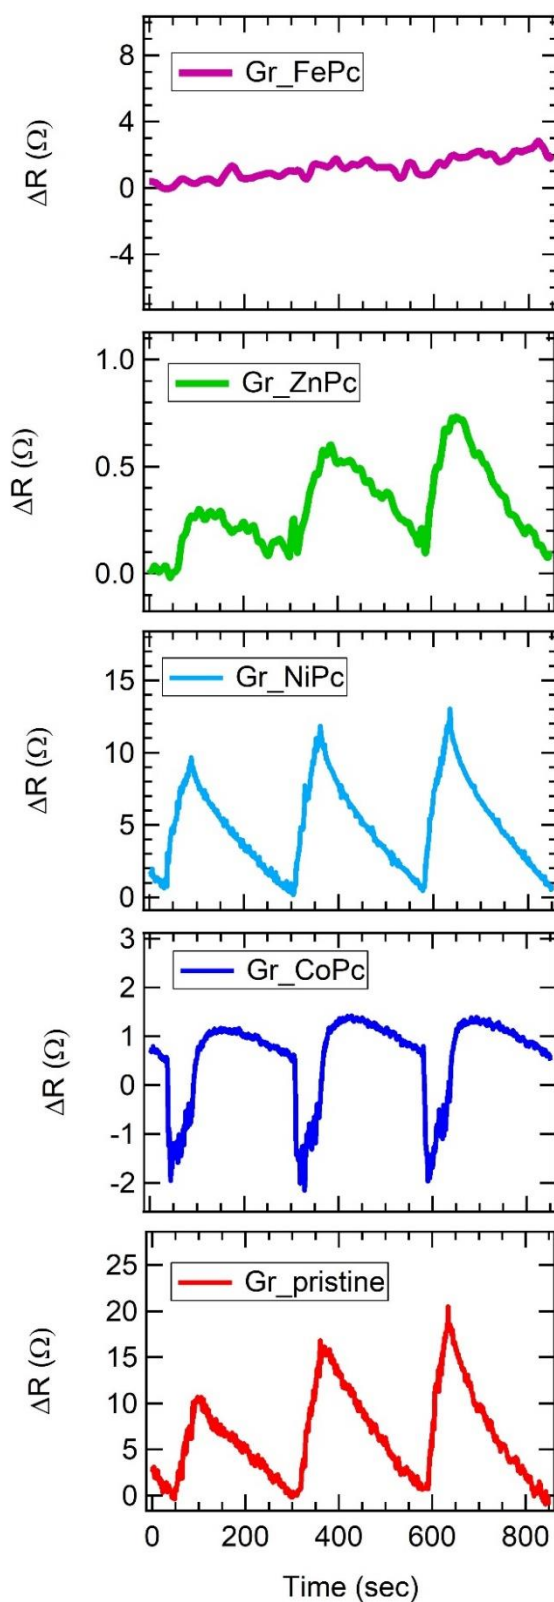

**Figure S4:** Variation of the resistance value of the sensor array to 1.4 ppm, 2.5 ppm and 3.7 ppm ammonia exposures. Gr\_FePc does not show a response, in agreement with the evaluated detection limit of 8 ppm. All the other sensors respond and then completely recover after each exposure.

**Table S.IV:** Recovery time as function of ammonia concentration for all the prepared sensors. Recovery time is here defined as the time required by the resistance value to fall by 80% with respect to the value achieved during the exposure. Data evaluated from the exposures presented in Figure S4.

| <b>Sample</b> | <b>1.4 ppm</b> | <b>2.5 ppm</b> | <b>3.7 ppm</b> |
|---------------|----------------|----------------|----------------|
| Gr_pristine   | 150s           | 155s           | 140s           |
| Gr_NiPc       | 135s           | 140s           | 140s           |
| Gr_CoPc       | 95s            | 100s           | 100s           |
| Gr_ZnPc       | 140s           | 155s           | 140s           |

## 6. Freundlich fitting parameters and detection limit evaluation

**Table S.V:** fitting parameter of the calibration curves plotted in Figure 3 of the main text.

| <b>Sensor</b> | <b>A</b>        | <b>pow</b>  | <b>y<sub>0</sub> (Ω)</b> |
|---------------|-----------------|-------------|--------------------------|
| Gr_FePc       | -               | -           | -                        |
| Gr_NiPc       | 0.004 ± 0.001   | 0.44 ± 0.01 | -0.00018 ± 0.00002       |
| Gr_ZnPc       | 0.0004 ± 0.0001 | 0.54 ± 0.02 | -0.00005 ± 0.00002       |
| Gr_pristine   | 0.006 ± 0.002   | 0.42 ± 0.06 | -0.0005 ± 0.0001         |

**Table S.VI:** detection limit for ammonia exposure evaluated according to the formula reported in ref. [71] of the main text:  $3[\text{NH}_3]/((R-R_0)/\sigma)$ .

| <b>Sensor</b> | <b>σ (Ω)</b>    | <b>dl (ppm)</b> |
|---------------|-----------------|-----------------|
| Gr_FePc       | -               | 8,00            |
| Gr_NiPc       | 0.096 ± 0.002   | 0,05            |
| Gr_ZnPc       | 0.04 ± 0.01     | 0,05            |
| Gr_pristine   | 0.354 ± 0.008   | 0,17            |
| Gr_CoPc       | 0.0050 ± 0.0003 | 0,03            |

## 7. Benchmarking for sensitivity and detection limit

Table S.VII: Benchmarking for sensitivity (defined as:  $(\Delta R/R_0 \cdot 100)/[\text{NH}_3]$ ) and detection limit. For literature works [Ref 28, 29, 73-84 in the main text] sensitivity is reported for the lowest concentration tested in each paper and for the best performing sensor. Of note: only articles clearly reporting gas concentration and sensor response/sensitivity have been taken into account for this benchmarking.

| <b>Sensor type</b>       | <b>Concentration (ppm)</b> | <b>Sensitivity (%ppm<sup>-1</sup>)</b> | <b>Detection limit (ppm)</b> | <b>Reference (main text)</b> |
|--------------------------|----------------------------|----------------------------------------|------------------------------|------------------------------|
| Gr_pristine              | 0.5                        | 0.80                                   | 0.17                         | Present work                 |
| Gr_NiPc                  | 0.5                        | 0.64                                   | 0.05                         | Present work                 |
| Gr_ZnPc                  | 0.5                        | 0.03                                   | 0.05                         | Present work                 |
| Gr_CoPc                  | 0.5                        | -0.24                                  | 0.03                         | Present work                 |
| Gr_FePc                  | 12                         | 0.03                                   | 8.0                          | Present work                 |
| Gr/AuNPs                 | 15                         | 0.17                                   | -                            | 73                           |
| Gr                       | 2                          | 2.05                                   | 0.5                          | 74                           |
| Gr/PANI                  | 20                         | 0.18                                   | 1                            | 75                           |
| TiO <sub>2</sub> @PPy-GN | 50                         | 2.04                                   | 1                            | 76                           |
| B-doped Gr               | 1                          | 0.04                                   | $0.6 \times 10^{-2}$         | 77                           |
| Gr                       | 75                         | 0.04                                   | -                            | 78                           |
| Gr                       | 100                        | 0.05                                   | -                            | 79                           |
| B-doped Gr               | 32                         | 0.28                                   | -                            | 80                           |
| Gr_NBD                   | 0.05                       | 11.78                                  | -                            | 28                           |
| Gr-TCN                   | 0.86                       | 6.33                                   | $4.2 \times 10^{-3}$         | 29                           |
| CuPc/rGO                 | 0.4                        | 4.5                                    | -                            | 81                           |
| NiPc/rGO                 | 100                        | 0.09                                   | 0.4                          | 82                           |
| ZnPc:rGO                 | 10                         | 0.003                                  | -                            | 83                           |
| cPoPcCo/rGO              | 100                        | 0.42                                   | $3.7 \times 10^{-3}$         | 84                           |



## 8. Ammonia exposures for CoPc layer

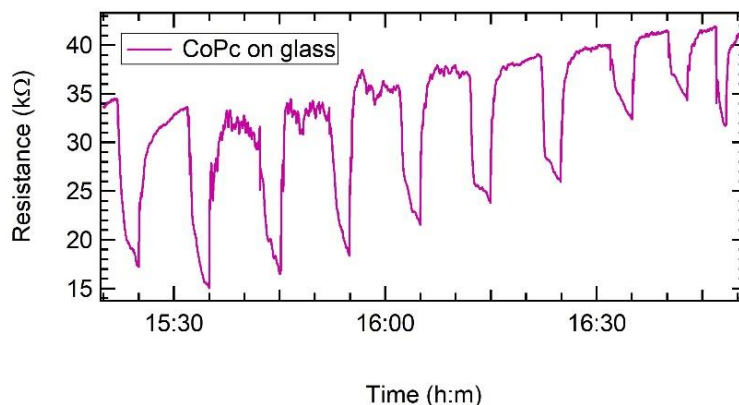

**Figure S5:** Response of a thick CoPc film on glass substrate upon exposures to several different ammonia concentration. An n-type doping of the GrPc layer itself is assessed.

## 9. Raman maps on Gr CoPc

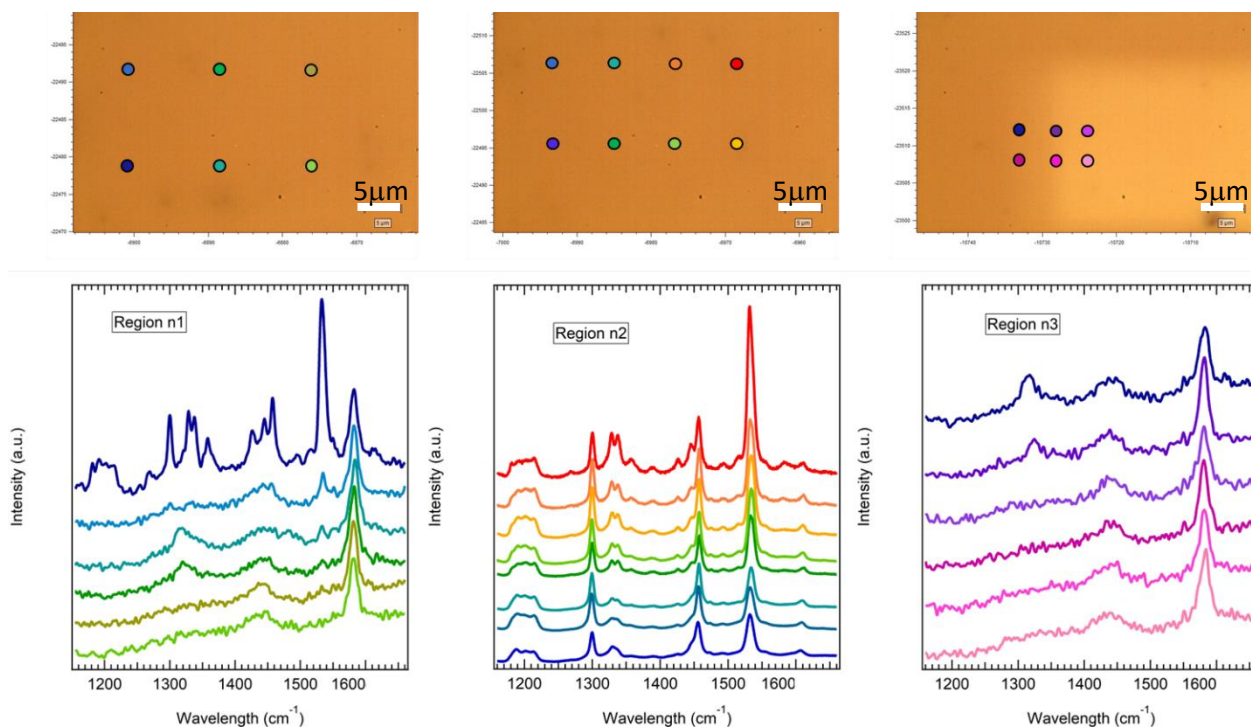

**Figure S6:** Top side: optical image collected with the sample; the spots where the Raman spectrum has been collected (with a map procedure) are enlightened. Bottom side: corresponding Raman spectra. It is clear that the layer is not completely covered by the phthalocyanine molecules. Indeed, in some spots of region 1 and all spots of region 3 only peaks attributable to graphene could be found. In region 2 all the spectra report the presence of the phthalocyanine molecules on the graphene layer. Different relative intensity between Gr and Pc peaks implies a different thickness coverage.

#### 10. Details on the $(\Delta R/R_0)_{pos}$ and $(\Delta R/R_0)_{neg}$ evaluation (referred to Figure 5 main text)

In order to estimate the  $(\Delta R/R_0)_{pos}$  and  $(\Delta R/R_0)_{neg}$  values reported in Figure 5 of the main text, as schematically illustrated in Figure 5-a, we proceed as follow:

- $(\Delta R/R_0)_{neg}$ : the  $R_0$  value is the resistance value before the gas exposure, while  $\Delta R=R-R_0$  is evaluated considering the difference between the lowest negative value  $R$  achieved by the resistance during the exposure and  $R_0$ ;
- $(\Delta R/R_0)_{pos}$ : the  $R_0$  value represents the lowest negative value achieved by the resistance during the exposure, while  $\Delta R=R-R_0$  is evaluated considering the difference between the highest positive value  $R$  achieved by the resistance during the exposure and  $R_0$ .

#### 11. Concentration range of all selected target gas molecules

Table S.VIII: Concentration range of the selected target gas molecules used for the PCA analysis.

| <b>Target gas</b>   | <b>Concentration range (ppm)</b> |
|---------------------|----------------------------------|
| Ammonia             | 0-13.5                           |
| Acetone             | 0-40                             |
| Ethanol             | 0-37                             |
| 2-propanol          | 0-40                             |
| Benzene             | 0-1                              |
| Sodium hypochlorite | 0-0.5                            |
| Hydrogen sulfide    | 0-2.5                            |
| Water               | 0-1000                           |
